# Supplementary material for: Fast and slow feedforward inhibitory circuits for cortical odor processing
Source: eLife. 2022 Mar 17;11:e73406. doi: 10.7554/eLife.73406 (PMC8929928; doi:10.7554/eLife.73406)
Supplement: Figure 1—source data 1. — This spreadsheet lists the mean and standard error of the mean (SEM) of the latency to first AP, AP height, and AP halfwidth for all neurogliaform (NG) and horizontal (HZ) cells in the dataset (shown as colored bars in Figure 1D) as well as the individual data for each cell (shown as points in Figure 1D). Additional parameters in the spreadsheet are not plotted. [file elife-73406-fig1-data1.xlsx]

## Sheet: Intrinsic
Intrinsic electrical properties of NG & HZ cells in vivo
Data shown in Figure 1D.
Gray shading highlights parameters plotted in Figure 1D. Note that RMP, Threshold Vm and AP Rise Time are not shown in this figure.
Mean & SEM are shown as colored bars in Figure 1D; values for individual cells are shown as points in Figure 1D.
NG Cells
Raw data file name	RMP (mV)	Lat to 1st AP (ms)	Threshold Vm (mV)	AP Height (mV)	AP RT (ms)	AP Halfwidth (ms)
13Aug2 #1 002	-57.4	103.91	-26	42.57	0.479	0.729
15Aug2 #1 002	-59.3	394.6	-8.31	30.96	0.587	0.794
15Aug2 #2 003	-58.2	106.93	-32.59	43.9	0.44	0.616
15Aug2 #3 050	-66.3	395.42	-32.84	46.84	0.467	0.579
20Aug2 #1 002	-53.8	85.36	-26.58	35.55	0.572	0.798
20Aug2 #2 003	-55.5	185.39	-12.48	28.58	0.568	0.788
21Aug2 #1 002	-59.3	143.38	-29.15	54.26	0.404	0.544
21Aug2 #3 002	-58.2	107.15	-21.6	37.6	0.449	0.597
25Oct2 #1 029	-60.6	169.48	-41.53	34.55	0.382	0.641
25Oct2 #2 002	-53.1	205.88	-28.83	44.33	0.52	0.714
01Nov2 #1 002	-63.5	377.56	-31.93	50.83	0.478	0.6
01Nov2 #4 003	-54.6	311.13	-33.12	41.79	0.595	0.746
05Nov2 #1 003	-63.2	264.65	-25.63	36.2	0.54	0.75
05Nov2 #2 002	-60.8	149.24	-33.14	50.64	0.46	0.58
06Nov2 #1 006	-65.3	368.33	-29.64	43.65	0.435	0.631
03Dec2 #1 002	-59.9	181.45	-30.75	53.07	0.482	0.614
03Dec2 #3 002	-64.6	216.77	-27.52	35.55	0.521	0.772
11Feb3 #3 002	-61.7	251.12	-34.56	51.82	0.533	0.856
18Feb3 #1 002	-63.1	179.22	-31.42	45.5	0.536	0.759
20Feb3 #1 002	-43.3	83.8	-26.72	39.52	0.548	0.714
20Feb3 #2 005	-52.8	43.15	-30.42	53.58	0.509	0.638
21Feb3 #1 002	-64.8	147.16	-26.71	44.77	0.484	0.775
14Mar3 #2 007	-63.1	152.92	-28.99	48.64	0.458	0.573
14Mar3 #4 002	-63.4	468.35	-30.27	44.07	0.711	0.97
15Mar3 #1 002	-67.1	176.75	-27.9	44.46	0.391	0.574
18Mar3 #1 004	-64.6	465.12	-39.2	59.44	0.473	0.687
18Mar3 #3 002	-58.8	97.11	-36.28	53.86	0.457	0.681
22Mar3 #1 002	-52	105.7	-26.8	41.7	0.567	0.762
22Mar3 #3 002	-51.2	333.39	-30.9	44.22	0.573	0.736
22Mar3 #4 002	-66.1	288.32	-34.22	45.42	0.464	0.567
25Mar3 #2 002	-62.8	250.04	-24.92	32.04	0.576	0.764
25Mar3 #3 005	-56.2	104.85	-33.17	39.25	0.547	0.863
26Mar3 #2 002	-61	147.74	-31.57	56.66	0.388	0.561
Mean	-59.5636	213.981	-29.2633	44.1158	0.502848	0.696152
SEM	0.932482	20.4496	1.10874	1.34179	0.0124428	0.018178
n cells	33	33	33	33	33	33
HZ Cells
Raw data file name	RMP (mV)	Lat to 1st AP (ms)	Threshold Vm (mV)	AP Height (mV)	AP RT (ms)	AP Halfwidth (ms)
16Aug2 #3 002	-55.5	74.94	-32.67	62.55	0.367	0.429
06Nov2 #2 002	-60.8	56.09	-29.2	53.2	0.375	0.478
11Feb3 #2 002	-54.5	40.84	-38.86	62.91	0.443	0.625
18Feb3 #2 002	-55.7	126.23	-26.84	58.32	0.364	0.553
21Feb3 #4 002	-59.9	23.53	-37.55	62.43	0.322	0.372
12Mar3 #2 002	-50.1	21.51	-38.14	52.24	0.373	0.508
13Mar3 #1 002	-48	15.84	-38.15	51.33	0.437	0.551
14Mar3 #1 003	-58.6	252.58	-31.13	66.62	0.371	0.384
25Mar3 #1 005	-64.7	109.32	-33.47	50.5	0.431	0.603
26Mar3 #1 002	-51.4	32.8	-39.19	58.46	0.583	0.72
26Mar3 #3 004	-69.4	104.23	-35.5	58.55	0.352	0.326
Mean	-57.1455	77.9918	-34.6091	57.9191	0.401636	0.504455
SEM	1.92681	20.978	1.2802	1.64107	0.021449	0.0363732
n cells	11	11	11	11	11	11
