# Supplementary material for: Fast and slow feedforward inhibitory circuits for cortical odor processing
Source: eLife. 2022 Mar 17;11:e73406. doi: 10.7554/eLife.73406 (PMC8929928; doi:10.7554/eLife.73406)
Supplement: Figure 2—source data 1. — The sheet ‘PkPk Summary’ in this spreadsheet lists the mean peak-to-peak amplitude, peak phase, and respiration frequency before, during, and after odor application for each NG and HZ cell in the dataset, for which the population mean and standard error of the mean (SEM) are plotted in Figure 2D. Additional parameters listed in the spreadsheet are not plotted in Figure 2D. The sheet ‘CrCov Summary’ in this spreadsheet lists the cross-covariance amplitude and cross-covariance lag before, during, and after odor application for the same dataset. The population mean and SEM of these data are plotted in panel D of Figure 2—figure supplement 1. [file elife-73406-fig2-data1.xlsx]

## Sheet: PkPk Summary
Summary of Peak-Peak analysis
Data for Figure 2D.
Mean & SEM are shown as colored bars in Figure 2D.
NG Cells
Num	Experiment	n files	Pk-Pk Amp (mV)						Pk Phase						Respiration Frequency (Hz)
			1. Before		2. During		3. After		1. Before		2. During		3. After		1. Before		2. During		3. After
	Total num odors:	232	Mean	SEM	Mean	SEM	Mean	SEM	Mean	SEM	Mean	SEM	Mean	SEM	Mean	SEM	Mean	SEM	Mean	SEM
1	1Nov2 #1	12	7.72125	0.763893	11.0564	1.17874	7.43154	0.683645	0.491667	0.0234467	0.448333	0.0339749	0.4575	0.023585	3.24829	0.0205528	3.32687	0.0528259	3.25312	0.0254206
2	1Nov2 #4	3	3.39628	0.426032	5.65131	0.646375	3.86878	0.439307	0.423333	0.0233333	0.566667	0.0533333	0.463333	0.0606447	3.62716	0.135274	3.893	0.243809	3.53894	0.159932
3	3Dec2 #1	15	12.9381	1.14293	13.8959	1.30637	11.7258	1.06986	0.372667	0.0188595	0.403333	0.0157258	0.376	0.0227784	2.72123	0.0135035	2.71634	0.0419751	2.70359	0.026276
4	3Dec2 #3	15	9.35259	0.747111	12.007	1.28046	10.4921	0.875808	0.535333	0.0289806	0.529333	0.0254009	0.537333	0.0222853	2.68216	0.0187994	2.63716	0.0534036	2.6525	0.0208003
5	5Nov2 #1	7	4.18461	0.729768	5.02084	0.880844	3.95463	0.726804	0.467143	0.0101686	0.4	0.0571131	0.475714	0.0408165	2.48687	0.0135174	2.40421	0.0859584	2.47442	0.013965
6	5Nov2 #2	8	4.67068	0.449151	5.02835	0.460153	3.86879	0.216921	0.605	0.133911	0.49875	0.0888907	0.69875	0.0536669	2.46168	0.0344318	2.45679	0.0485903	2.49813	0.0302897
7	6Nov2 #1	14	7.12682	0.887431	7.43031	0.719784	6.78161	0.611966	0.466429	0.0376451	0.45	0.0173205	0.429286	0.0184112	3.21778	0.0179797	3.30437	0.0322737	3.23988	0.0185905
8	11Feb3 #3	15	5.14955	0.663487	7.4149	1.03878	5.84101	0.831354	0.566667	0.0671719	0.514667	0.0487058	0.516667	0.0507906	2.51291	0.0764748	2.66131	0.0681995	2.50908	0.0890695
9	14Mar3 #2	15	9.73874	1.01448	8.5211	0.823727	9.33032	0.9696	0.405333	0.0196848	0.390667	0.0265736	0.393333	0.0201345	2.68647	0.0138764	2.72852	0.015898	2.67731	0.0172285
10	14Mar3 #4	14	2.6251	0.18909	3.84656	0.487194	2.75919	0.279433	0.488571	0.0291991	0.572143	0.0331361	0.452143	0.0264612	2.61495	0.0168105	2.65191	0.047591	2.60301	0.015364
11	15Aug2 #1	8	6.34494	1.12963	8.89447	1.17854	8.05944	1.11069	0.26625	0.0478441	0.35875	0.0460759	0.33375	0.0296971	2.43428	0.061735	2.37177	0.0706508	2.42031	0.0420267
12	15Aug2 #2	4	4.88274	0.132898	9.04904	1.03797	5.71152	0.69411	0.515	0.145516	0.45	0.03937	0.3325	0.137924	2.70257	0.040438	2.74584	0.0443786	2.51359	0.23633
13	15Aug2 #3	12	4.65037	0.466183	7.41001	0.784396	5.21598	0.606778	0.546667	0.0723034	0.554167	0.0521864	0.54	0.0849331	2.74456	0.0417372	2.82552	0.0862098	2.8316	0.063133
14	15Mar3 #1	5	10.3328	1.8856	10.5407	2.11039	10.1125	1.29565	0.23	0.0296648	0.234	0.059716	0.286	0.0355809	3.46064	0.137651	3.35404	0.0501276	3.33788	0.0731091
15	18Feb3 #1	15	14.9496	1.05107	11.7332	0.680072	13.5307	0.97817	0.406667	0.00969372	0.378667	0.0277208	0.405333	0.0164423	2.52525	0.0123364	2.46087	0.0587717	2.52975	0.00934754
16	18Mar3 #1	15	4.56617	0.312013	4.9634	0.329125	4.45614	0.247848	0.501333	0.0275658	0.563333	0.0185335	0.506667	0.027127	3.34557	0.0219119	3.36388	0.048723	3.3645	0.0183798
17	20Feb3 #2	2	5.67149	2.93556	9.21499	2.45241	5.52475	1.81526	0.5	0.02	0.44	0.01	0.42	0.01	3.00268	0.0421294	3.2253	0.0520786	3.02499	0.0854323
18	21Feb3 #1	15	6.44826	0.60638	7.7578	0.769333	5.81479	0.630727	0.381333	0.0462588	0.382	0.0264611	0.352667	0.0211675	2.66842	0.0249463	2.71618	0.0188118	2.64042	0.0124891
19	22Mar3 #1	13	4.37971	0.534212	4.44365	0.284064	3.92004	0.432958	0.504615	0.0201474	0.523846	0.0401046	0.567692	0.0233467	2.98517	0.0259185	3.1091	0.0536832	3.01091	0.0325738
20	25Mar3 #2	7	10.3672	1.42227	13.1843	1.90003	10.8121	1.68361	0.427143	0.0236758	0.414286	0.0240888	0.408571	0.0333401	2.49813	0.135013	2.44978	0.0360336	2.25068	0.0782519
21	25Mar3 #3	4	1.37472	0.219848	4.17791	1.2077	2.99297	1.15553	0.705	0.0977667	0.45	0.0191485	0.38	0.0371932	2.37892	0.114326	2.63575	0.144137	2.40243	0.031076
22	26Mar3 #2	14	6.41564	0.673224	7.51347	0.655442	5.65928	0.225877	0.545714	0.0783814	0.435	0.0447551	0.482857	0.071648	2.75075	0.0440443	2.75202	0.0888176	2.79846	0.0412235
		Mean	6.69488		8.12526		6.72109		0.470539		0.452634		0.446186		2.80711		2.85411		2.78525
		SEM	0.718653		0.639589		0.652865		0.02247		0.0177082		0.0199071		0.0770136		0.0855174		0.0777848
HZ Cells			nr = noisy respiration
Num	Experiment	n files	Pk-Pk Amp (mV)						Pk Phase						Respiration Frequency (Hz)
			1. Before		2. During		3. After		1. Before		2. During		3. After		1. Before		2. During		3. After
	Total num odors:	98	Mean	SEM	Mean	SEM	Mean	SEM	Mean	SEM	Mean	SEM	Mean	SEM	Mean	SEM	Mean	SEM	Mean	SEM
1	06Nov2 #2 (nr)	14	8.06981	0.685099	10.5412	1.02462	9.51368	0.626745	0.328571	0.0336082	0.454286	0.0458103	0.370714	0.0311054	2.9847	0.0433359	3.15555	0.0787536	3.09835	0.0738268
2	12Mar3 #2	4	8.42922	1.30921	10.4108	0.319474	10.9623	0.895898	0.545	0.0306866	0.4525	0.0652399	0.525	0.0104083	2.93776	0.0775633	2.98452	0.0587505	2.70955	0.209013
3	13Aug2 #2 (nr)	6	8.59973	0.893699	10.2844	1.8204	9.01601	1.14135	0.311667	0.0861555	0.203333	0.0473052	0.363333	0.134305	2.3289	0.172722	2.49197	0.0776783	2.1673	0.169862
4	13Mar3 #1	15	2.01547	0.245694	2.88586	0.318251	2.68208	0.243314	0.664667	0.0236818	0.710667	0.0324032	0.672	0.0163066	3.01187	0.0131972	2.90159	0.0606795	3.02173	0.0202563
5	14Mar3 #1	15	17.0596	0.889228	8.82013	0.955161	16.3719	0.781806	0.497333	0.0186565	0.54	0.0425273	0.459333	0.01311	2.72919	0.0131327	2.78759	0.0210685	2.72797	0.0128487
6	18Feb3 #2	15	9.771	0.828975	9.79183	0.575082	10.0358	0.666614	0.396667	0.0264695	0.352667	0.0541116	0.452	0.0376348	2.27576	0.0140495	2.27836	0.0204979	2.29275	0.0125615
7	21Feb3 #4	6	5.91093	0.762426	5.68076	0.346399	6.22554	0.610754	0.478333	0.0920658	0.56	0.0820975	0.415	0.117381	2.38571	0.0238249	2.30677	0.112636	2.37057	0.0370386
8	25Mar3 #1	11	5.41503	0.880777	8.44144	0.980836	6.66566	0.95481	0.440909	0.0266784	0.513636	0.040503	0.455455	0.0511391	2.54007	0.068572	2.48706	0.0767037	2.51218	0.0637183
9	26Mar3 #1	12	2.87156	0.280626	2.74816	0.208891	3.00251	0.2147	0.426667	0.0785892	0.3625	0.0852636	0.483333	0.0997294	2.6743	0.0629569	2.8169	0.0561356	2.76431	0.0316625
	Mean		7.57137		7.73384		8.27505		0.454424		0.461065		0.466241		2.65203		2.69004		2.62941
	SEM		1.47794		1.05438		1.41341		0.0363865		0.0484616		0.0309097		0.0955754		0.103454		0.106444

## Sheet: CrCov Summary
Summary of Cross-Covariance analysis
Data for Figure 2D - Figure Supplement 1.
Mean & SEM are shown as colored bars in Figure 2D - Figure Supplement 1.
NG Cells
Num	Experiment	n files	Cr-Cov Amp (arb units)						Cr-Cov Lag
			1. Before		2. During		3. After		1. Before		2. During		3. After
	Total num odors:	232	Mean	SEM	Mean	SEM	Mean	SEM	Mean	SEM	Mean	SEM	Mean	SEM
1	1Nov2 #1	12	35.027	4.11796	50.8707	6.23789	35.5357	4.21715	0.51385	0.0234822	0.481193	0.023767	0.486311	0.0235531
2	1Nov2 #4	3	15.9253	1.05407	26.3961	1.47277	20.5724	2.92032	0.44995	0.0316086	0.565258	0.0277797	0.483114	0.0468247
3	3Dec2 #1	15	56.6409	5.76316	57.3162	6.66778	49.5662	5.90478	0.433217	0.0304348	0.464934	0.0288039	0.452095	0.0298213
4	3Dec2 #3	15	39.8566	3.69157	54.2732	7.14788	46.258	4.65362	0.456137	0.0216846	0.488891	0.0212247	0.489329	0.0211036
5	5Nov2 #1	7	14.8195	3.55574	19.4914	4.45935	14.2731	3.29116	0.51881	0.0360482	0.42498	0.0469406	0.509903	0.0314895
6	5Nov2 #2	8	11.0502	1.11365	15.038	2.16438	9.49235	1.09357	0.175034	0.0648923	0.448995	0.0635544	0.379996	0.0679264
7	6Nov2 #1	14	31.7919	4.5251	35.0729	4.28747	30.8633	3.23059	0.448117	0.034217	0.447822	0.0148451	0.480571	0.0250639
8	11Feb3 #3	15	17.8082	3.02969	28.9864	4.81706	19.6534	3.62817	0.398463	0.0514781	0.533178	0.0324929	0.480931	0.0389756
9	14Mar3 #2	15	39.4426	4.10094	32.2412	3.78586	38.0276	4.27376	0.496596	0.0297303	0.430741	0.028879	0.475563	0.0303507
10	14Mar3 #4	14	7.84502	0.780241	14.9447	2.57983	8.50557	1.15421	0.458276	0.0234378	0.49325	0.0268354	0.508937	0.0223621
11	15Aug2 #1	8	19.6203	4.18622	31.8315	3.91122	29.2038	4.36633	0.444614	0.0666999	0.348303	0.0477678	0.449945	0.0503712
12	15Aug2 #2	4	17.471	3.61407	36.0706	5.65763	15.7652	2.7596	0.50038	0.0877908	0.481793	0.0576098	0.496593	0.127249
13	15Aug2 #3	12	14.3575	2.49583	28.1461	3.94477	17.9692	4.02767	0.491479	0.0701386	0.521829	0.0493942	0.368708	0.0692735
14	15Mar3 #1	5	51.4082	11.9495	45.8352	11.953	46.1817	7.79676	0.647551	0.0864681	0.377063	0.0799194	0.419338	0.0891347
15	18Feb3 #1	15	64.1099	5.54982	39.7547	3.42317	56.5365	5.30405	0.443848	0.0262069	0.410972	0.0326684	0.383917	0.00929697
16	18Mar3 #1	15	19.2091	1.31916	21.627	1.80299	18.5229	1.15161	0.49087	0.011108	0.524914	0.0190656	0.475996	0.0148107
17	20Feb3 #2	2	26.8704	12.0608	40.7645	8.69547	22.2029	4.18843	0.510477	0.00866334	0.441446	0.0160758	0.447428	0.0592596
18	21Feb3 #1	15	24.4262	2.7437	30.9887	3.64715	22.7264	2.7428	0.405242	0.0531917	0.442348	0.0376811	0.432034	0.0447609
19	22Mar3 #1	13	18.021	2.3858	17.3836	1.66554	14.1711	1.85168	0.494283	0.0173129	0.476912	0.0316658	0.494878	0.0432505
20	25Mar3 #2	7	40.2288	6.22798	55.4956	11.6039	41.486	6.17588	0.444342	0.0332288	0.468789	0.0533439	0.465075	0.0357427
21	25Mar3 #3	4	2.98643	0.940891	14.502	4.98994	10.8899	4.10822	0.318562	0.164673	0.48066	0.036791	0.471652	0.0668589
22	26Mar3 #2	14	20.8648	2.83505	29.5617	3.46587	21.2138	1.65978	0.417326	0.0680716	0.548491	0.0342287	0.429296	0.0532512
		Mean	26.8082		33.0269		26.8008		0.45261		0.468307		0.458255
		SEM	3.44321		2.8684		3.02515		0.0186391		0.0113226		0.00872927
HZ Cells			nr = noisy respiration
Num	Experiment	n files	Cr-Cov Amp (arb units)						Cr-Cov Lag
			1. Before		2. During		3. After		1. Before		2. During		3. After
	Total num odors:	98	Mean	SEM	Mean	SEM	Mean	SEM	Mean	SEM	Mean	SEM	Mean	SEM
1	06Nov2 #2 (nr)	14	34.984	4.78528	46.2836	5.49179	39.8845	3.43802	0.434906	0.0389626	0.43469	0.0306841	0.416277	0.0413669
2	12Mar3 #2	4	39.4549	8.49804	44.0423	5.33157	42.8185	11.1505	0.531083	0.0190756	0.542362	0.0393229	0.498373	0.0283891
3	13Aug2 #2 (nr)	6	24.1689	4.11867	37.9678	8.98668	22.5986	7.13169	0.350688	0.10111	0.282722	0.110159	0.212647	0.0607482
4	13Mar3 #1	15	8.76445	1.27875	10.7823	1.87882	12.0007	1.14701	0.447171	0.0371376	0.512454	0.0465789	0.460607	0.0419168
5	14Mar3 #1	15	80.2581	5.33341	34.4911	4.69032	73.2574	4.27948	0.478677	0.0130893	0.49092	0.0357234	0.477134	0.0161917
6	18Feb3 #2	15	29.6266	2.97231	26.9512	1.74387	31.756	2.42472	0.399763	0.0317922	0.329405	0.0430017	0.466742	0.0345541
7	21Feb3 #4	6	13.2725	3.37733	14.4512	1.46134	14.7357	2.67319	0.384386	0.0917364	0.322184	0.0668599	0.344746	0.128041
8	25Mar3 #1	11	22.4622	3.14706	32.9741	6.12922	25.7423	4.20588	0.49923	0.0290772	0.457818	0.0417608	0.498013	0.0395714
9	26Mar3 #1	12	8.09824	1.41401	9.01045	1.40576	8.02914	0.732211	0.338054	0.0771796	0.495061	0.07334	0.450993	0.0950161
	Mean		29.01		28.5505		30.0914		0.429329		0.429735		0.425059
	SEM		7.39059		4.70944		6.71733		0.0221843		0.0315343		0.0308961
