# Supplementary material for: Fast and slow feedforward inhibitory circuits for cortical odor processing
Source: eLife. 2022 Mar 17;11:e73406. doi: 10.7554/eLife.73406 (PMC8929928; doi:10.7554/eLife.73406)
Supplement: Figure 4—source data 1. [file elife-73406-fig4-data1.xlsx]

## Sheet: Amp vs Slope
Z-scored EPSP Amplitude vs Slope
Data shown in Figure 4C.
Column 'Number' is label for cell-odor pair.
NG				HZ
Number	Peak amp (z-scored)	Slope		Number	Peak amp (z-scored)	Slope
1	19.44	-0.61		1	22.58	1.39
2	16.12	-0.52		2	20.56	0.63
3	14.51	-0.83		3	19.67	0.3
4	14.41	-1.26		4	16.96	0.51
5	14.28	-1.02		5	16.39	0.94
6	14.11	-1.55		6	14.99	1.09
7	13.25	-0.99		7	13.67	0.99
8	12.94	-1.04		8	12.66	1.52
9	11.81	-0.15		9	11.94	0.86
10	11.49	-0.43		10	11.59	0.01
11	10.68	-0.55		11	11.03	0.51
12	10.45	-0.33		12	9.77	0.5
13	10.42	-0.08		13	9.44	0.41
14	10.18	-0.58		14	8.98	0.48
15	9.51	-0.6		15	7.8	0.55
16	9.49	-0.54		16	6.58	-0.03
17	9.15	0.01		17	6.38	-0.39
18	9.11	-0.46		18	6.34	0.12
19	8.97	-0.29		19	6.27	0.38
20	8.6	-0.65		20	6.07	0.09
21	8.6	-0.76		21	6	0.18
22	8.44	-0.55		22	5.78	0.14
23	8.32	-1.07		23	5.63	0.39
24	8.31	-0.24		24	5.55	0.02
25	8.31	-0.66		25	5.47	0.26
26	8.18	-0.16		26	5.45	-0.04
27	8.07	-0.49		27	5.31	0.05
28	7.99	-0.57		28	5.29	0
29	7.88	-0.13		29	5.26	0.01
30	7.64	-0.65		30	5.16	0.15
31	7.58	-0.45		31	5.14	-0.15
32	7.56	-0.54		32	5.03	0.29
33	7.5	-0.82		33	4.93	0.11
34	7.49	-0.24		34	4.9	0.06
35	7.49	-0.52		35	4.9	0.25
36	7.47	-0.34		36	4.73	0.69
37	7.44	-0.28		37	4.71	0.15
38	7.36	-0.55		38	4.68	0.17
39	7.32	-0.64		39	4.47	0.26
40	7.29	-0.34		40	4.41	0.29
41	7.28	-0.15		41	4.39	0.2
42	6.96	-0.3		42	4.24	0.25
43	6.91	-0.2		43	4.19	-0.33
44	6.88	-0.36		44	4.14	0.14
45	6.85	-0.12		45	4.14	-0.09
46	6.82	-0.34		46	4.07	0.5
47	6.79	-0.29		47	3.93	0.01
48	6.7	-0.48		48	3.92	-0.65
49	6.63	-0.52		49	3.91	0.18
50	6.61	-0.49		50	3.91	0.06
51	6.6	-0.38		51	3.81	0.17
52	6.58	-0.65		52	3.75	0.14
53	6.55	-0.62		53	3.71	-0.22
54	6.54	-0.35		54	3.7	0
55	6.52	-0.3		55	3.58	0.02
56	6.51	-0.17		56	3.57	0.18
57	6.49	-0.02		57	3.54	-0.12
58	6.48	-0.25		58	3.52	0.18
59	6.47	-0.88		59	3.51	0.4
60	6.43	-0.43		60	3.49	0.09
61	6.4	-0.28		61	3.39	0.63
62	6.3	-0.1		62	3.26	0.25
63	6.3	-0.09		63	3.25	0.14
64	6.23	-0.3		64	3.24	0.15
65	6.22	-0.64		65	3.19	0.02
66	6.21	-0.42		66	3.02	0.34
67	6.2	-0.77		67	3	0.11
68	6.16	-0.7		68	2.95	0.07
69	6.14	0.24		69	2.94	0.03
70	5.87	-0.3		70	2.92	0.23
71	5.75	0.28		71	2.87	-0.22
72	5.74	-0.11		72	2.86	-0.03
73	5.71	0.18		73	2.84	-0.2
74	5.66	-0.89		74	2.82	-0.05
75	5.64	-0.31		75	2.79	-0.04
76	5.62	-0.57		76	2.75	-0.02
77	5.61	-0.3		77	2.71	0.17
78	5.51	0		78	2.71	0.49
79	5.45	-0.5		79	2.7	0.35
80	5.44	-0.41		80	2.68	-0.03
81	5.36	0.23		81	2.68	0.1
82	5.31	0.31		82	2.68	0.1
83	5.29	-0.51		83	2.62	-0.01
84	5.27	-0.55		84	2.58	0.16
85	5.27	-0.37		85	2.48	0.03
86	5.26	-0.08		86	2.48	0.19
87	5.23	-0.41		87	2.47	0.03
88	5.2	-0.23		88	2.41	0.17
89	5.2	-0.29		89	2.36	0.17
90	5.2	-0.15		90	2.25	0.39
91	5.19	-0.1		91	2.23	-0.2
92	5.16	-0.18		92	2.11	0.14
93	5.16	-0.06		93	2.11	0.29
94	5.15	0.05		94	2.11	0.19
95	5.14	-0.12		95	2.1	0.15
96	5.09	-0.09		96	2.06	0.29
97	5.04	-0.05		97	2.06	0.37
98	5.02	-0.04		98	2.06	0.22
99	4.91	-0.21		99	2.04	-0.05
100	4.89	-0.26		100	2.04	0.37
101	4.87	-0.02		101	2.03	0.9
102	4.86	-0.39		102	1.96	-0.02
103	4.85	0.43		103	1.95	-0.25
104	4.84	-0.26		104	1.95	0.1
105	4.77	-0.25		105	1.94	-0.04
106	4.75	0.24		106	1.93	0.15
107	4.7	-0.41		107	1.91	0.35
108	4.7	-0.16		108	1.9	0.05
109	4.65	-0.16		109	1.87	0.26
110	4.64	-0.25		110	1.86	-0.28
111	4.63	-0.08		111	1.84	-0.01
112	4.63	-0.24		112	1.83	-0.05
113	4.58	-0.05		113	1.81	0.21
114	4.55	-0.47		114	1.8	0.04
115	4.54	-0.26		115	1.79	-0.15
116	4.53	0.37		116	1.73	0.27
117	4.52	-0.26		117	1.71	0.18
118	4.52	-0.21		118	1.66	0.14
119	4.49	-0.53		119	1.62	0.01
120	4.4	-0.13		120	1.58	0.04
121	4.39	0.27		121	1.55	0.72
122	4.39	-0.3		122	1.53	0.15
123	4.38	0.05		123	1.46	-0.02
124	4.37	-0.38		124	1.45	0.19
125	4.37	-0.38		125	1.44	0.19
126	4.34	-0.26		126	1.42	0.47
127	4.32	-0.22		127	1.42	0.11
128	4.31	-0.26		128	1.41	0.06
129	4.29	-0.76		129	1.41	0.24
130	4.27	-0.29		130	1.33	0.32
131	4.22	-0.27		131	1.33	0.01
132	4.16	-0.16		132	1.32	0.64
133	4.14	-0.07		133	1.31	-0.06
134	4.12	-0.14		134	1.31	0.12
135	4.1	0.22		135	1.31	-0.04
136	4.09	-0.31		136	1.29	-0.02
137	4.08	0.03		137	1.28	-0.12
138	4.07	-0.46		138	1.23	0.09
139	4.06	-0.52		139	1.22	-0.1
140	4.06	-0.13		140	1.21	0.27
141	4.05	-0.08		141	1.21	0.41
142	4.04	-0.24		142	1.18	0.12
143	3.99	-0.58		143	1.18	-0.11
144	3.98	-0.32		144	1.14	0.07
145	3.95	-0.37		145	1.13	0.13
146	3.93	-0.44		146	1.12	0.63
147	3.91	-0.16		147	1.1	0.68
148	3.9	-0.44		148	1.03	0.1
149	3.89	-0.28		149	1.03	0.02
150	3.89	-0.23		150	1.02	0.01
151	3.84	-0.31		151	0.96	0.25
152	3.84	0.16		152	0.9	0.05
153	3.84	0.26		153	0.89	0.28
154	3.84	-0.06		154	0.86	0
155	3.81	-0.21		155	0.82	0.51
156	3.79	-0.34		156	0.77	-0.03
157	3.79	-0.28		157	0.77	0.12
158	3.78	-0.12		158	0.76	0.31
159	3.78	-0.43		159	0.71	0.21
160	3.78	-0.2		160	0.68	0.58
161	3.76	-0.22		161	0.65	0.29
162	3.76	-0.35		162	0.64	0.1
163	3.76	-0.15		163	0.58	0.02
164	3.75	-0.23		164	0.57	-0.34
165	3.73	0.03		165	0.56	0.23
166	3.69	0.13		166	0.54	0.12
167	3.69	0.02		167	0.49	-0.21
168	3.68	-0.28		168	0.47	0.19
169	3.65	-0.26		169	0.45	0.16
170	3.65	0.06		170	0.45	0.25
171	3.62	-0.08		171	0.44	0.06
172	3.61	0		172	0.43	0.05
173	3.59	-0.38		173	0.41	0.33
174	3.57	-0.29		174	0.4	0.08
175	3.57	-0.11		175	0.39	0.09
176	3.55	-0.41		176	0.33	0.41
177	3.54	-0.32		177	0.31	0.12
178	3.52	0.04		178	0.28	-0.05
179	3.5	-0.38		179	0.18	0.03
180	3.49	0.09		180	0.04	0.06
181	3.47	-0.14		181	-0.01	0.22
182	3.45	0.02		182	-0.03	0.51
183	3.41	-0.12		183	-0.16	0.48
184	3.4	-0.23		184	-0.27	0.07
185	3.39	-0.26		185	-0.28	-0.01
186	3.37	-0.07		186	-0.47	0.38
187	3.34	-0.04		187	-0.71	0.6
188	3.3	-0.04		188	-0.72	0.18
189	3.29	-0.25
190	3.27	-0.11
191	3.25	-0.36
192	3.2	-0.15
193	3.2	-0.1
194	3.19	0.24
195	3.17	-0.47
196	3.17	-0.08
197	3.14	-0.22
198	3.13	-0.07
199	3.1	-0.2
200	3.06	-0.55
201	3.01	-0.01
202	3	0.04
203	2.97	-0.19
204	2.97	-0.14
205	2.96	0.31
206	2.95	0.08
207	2.91	-0.29
208	2.91	-0.14
209	2.89	-0.21
210	2.88	0.14
211	2.86	-0.16
212	2.86	-0.38
213	2.84	-0.16
214	2.83	-0.05
215	2.83	-0.38
216	2.81	-0.21
217	2.8	-0.61
218	2.79	-0.18
219	2.77	-0.49
220	2.77	-0.2
221	2.74	-0.17
222	2.71	-0.36
223	2.69	-0.16
224	2.68	0.04
225	2.66	-0.12
226	2.65	-0.2
227	2.64	-0.28
228	2.63	-0.14
229	2.62	-0.13
230	2.59	0.25
231	2.55	-0.22
232	2.53	-0.34
233	2.48	-0.21
234	2.46	-0.39
235	2.43	-0.14
236	2.43	-0.19
237	2.41	-0.2
238	2.41	-0.13
239	2.4	-0.05
240	2.39	-0.21
241	2.37	-0.13
242	2.35	-0.21
243	2.32	-0.31
244	2.32	0.3
245	2.25	-0.04
246	2.24	0.12
247	2.22	-0.27
248	2.2	-0.04
249	2.17	0.1
250	2.15	0
251	2.14	-0.31
252	2.14	-0.16
253	2.11	-0.07
254	2.1	-0.03
255	2.08	-0.27
256	2.07	0.31
257	2.05	0.28
258	2.02	-0.21
259	2	-0.22
260	1.97	-0.14
261	1.97	-0.01
262	1.96	-0.09
263	1.94	-0.27
264	1.91	-0.08
265	1.9	-0.18
266	1.89	-0.17
267	1.88	-0.02
268	1.88	-0.14
269	1.88	0.05
270	1.86	-0.13
271	1.8	-0.25
272	1.8	0.15
273	1.78	-0.1
274	1.72	-0.19
275	1.72	-0.15
276	1.72	-0.12
277	1.72	-0.15
278	1.66	-0.12
279	1.63	-0.19
280	1.61	0.02
281	1.6	-0.04
282	1.6	-0.04
283	1.58	-0.08
284	1.49	-0.03
285	1.48	-0.19
286	1.45	-0.12
287	1.43	-0.1
288	1.35	-0.19
289	1.31	0.21
290	1.29	0.07
291	1.24	-0.03
292	1.2	-0.22
293	1.13	-0.08
294	1.07	-0.26
295	1.04	0.13
296	1	-0.28
297	0.98	0.08
298	0.97	0.04
299	0.92	-0.17
300	0.91	0.02
301	0.78	-0.18
302	0.62	0.09
303	0.52	-0.15
304	0.36	0.24
305	0.25	-0.04
306	0.2	-0.13
307	0.12	-0.13
308	0.11	0.07
309	-0.21	0.17
310	-0.34	-0.01
